# Supplementary material
Source: PubMed Central journal article supplement (PMC4350146)
Supplement: Supp_Table1.pdf [file Supp_Table1.pdf]

## Supplementary Data

SUPPLEMENTARY TABLE S1. PROBE SET IDENTITIES AND SEQUENCES

| <i>Probe set No.</i> | <i>Sequences (4/set)</i>                                                                                             | <i>NCOA7 exon interrogated</i> | <i>Induction</i> |
|----------------------|----------------------------------------------------------------------------------------------------------------------|--------------------------------|------------------|
| 2924541              | TAAAACACTGTATTATTATCTTCC<br>CTTGTCTGGCTCTAAAACACTGTGTA<br>TGTTGCACTTGTCTGGCTCTAAAAC<br>TCTCTTTAGTTCTGTACGCCTGATC     | Exon 2                         | No               |
| 2924557              | TAGGAGTCACTATCATAACACCGCC<br>CCATTTTCAATAACCAGAGGATCAG<br>GGCAGATGAGACCATACTCCTCACA<br>TGTAGAGCGCAATGGAAACAACCTC     | Exon 7                         | No               |
| 2924564              | GCTTTCTGGCGAACCCAGACTGCTTG<br>TGTGTTTTCTACTCGGCTTTCTGGC<br>AATTTTCAGATACCTGTGGCCCTTC<br>GAACTACTAAGGGTAATGTCTATTTC   | Exon8 (middle)                 | No               |
| 2924566              | TAACAGCCACAACCTGAACCTTCAGAT<br>TCTTTAACAGCCACAACCTGAACCTTC<br>GGGTACCTGAATTCTCTTTAACAGC<br>ATGGGTACCTGAATTCTCTTTAACA | Exon 8 (3' end)                | No               |
| 2924567              | TCCCACCTTTGATGCACAGGAACATG<br>TCCCACCTTTGATGCACAGGAACATG<br>TCCCACCTTTGATGCACAGGAACATG<br>GAGGAACAGCAAACCAGTACTCTGG  | Exon 9                         | No               |
| 2924579              | TAGACATCGGGAGACCACTGAACAA<br>CTTTTCCATAGACATCGGGAGACCA<br>AAGAAGTTGTCAATCATGTTTCAGTT<br>CCCAGCTCTTGGTTGTTGGCTCACT    | Exon 10                        | No               |
| 2924584              | GCGCTTTGCCTCTTCAACAGTGATG<br>CGTCCTCGTCTTCATAGTAGCTGCA<br>ACAGGCAGCACCTCTTCGTCTCTCGT<br>CATATTCTCCAGGAGCGCGCTGTGG    | Exon 11                        | Yes              |
| 2924585              | CATGGATACCCTTGCACCCTTGCAG<br>TAACGTGCTATAGGCCAGTCTCCAT<br>GATTTCCGGTAGAGCGTCTTTAAGC<br>TGATGACCAATAGGACAGGACTGTC     | Exon 12                        | Yes              |
| 2924592              | ATCTAGCCATAAACCAAATCGTCCC<br>GCATCTAGCCATAAACCAAATCGTC<br>CAGCATCTAGCCATAAACCAAATCG<br>TCAGCATCTAGCCATAAACCAAATC     | Exon 15 (5' end)               | Yes              |
| 2924593              | AGAGTTGCTTCGTCCGTGGTATAAA<br>GCTGCAAGAGTTGCTTCGTCCGTGG<br>TTATTGAAAGTGCTGCAAGAGTTGC<br>GAAAGAATATCATTATTGAAAGTGC     | Exon 15 (3' end)               | Yes              |
| 2924594              | GCTTTAGGAGGGCTGATCGAACCCA<br>GAAGTGGGAGTACAAAGTCTTTTCA<br>AACACTCTGATTCCTCACTGTATGG<br>CACAAGGCATGTATATATCCACAGT     | Exon 15 (3' UTR)               | Yes              |
| 2924595              | TATAAATCAAACAGATTTGTTCCCA<br>TATATGCTGCTTAAGACCTATCACC<br>GGAAAGCTGGCCTATAATAGTCAAA<br>TGTACGCTTTTATTGACTAAATGGA     | Exon 15 (3' UTR)               | Yes              |

Each probe set of 4 individual or overlapping probes hybridizes to a specific exon of NCOA7. The exon identified by each probe set is listed and the induction characteristic of each exon is indicated.

NCOA7, nuclear receptor coactivator protein 7.
